# Supplementary material for: Role of Monomer/Tetramer Equilibrium of Rod Visual Arrestin in the Interaction with Phosphorylated Rhodopsin
Source: MDPI journal article supplement (doi:10.3390/ijms24054963), 2023-03-04
Supplement: s1 [file s1]

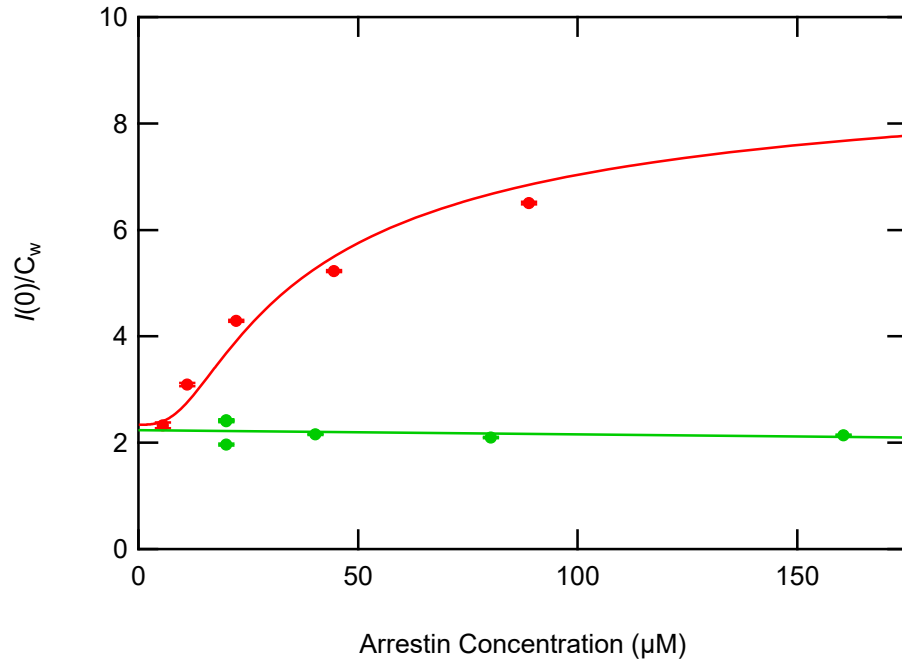

Figure S1: Concentration dependence of  $I(0)/C_w$  for arrestin (red) and ovalbumin (green).  $I(0)/C_w$  for ovalbumin (green) was fitted by linear line, whereas that of arrestin was fitted with the curve generated by Eq. 1 to estimate  $K_{Att}$ .  $I(0)/C_w$  for arrestin monomer was estimated by using  $I(0)/C_w$  for ovalbumin and molecular weights of arrestin (45 K) and ovalbumin (43 K).

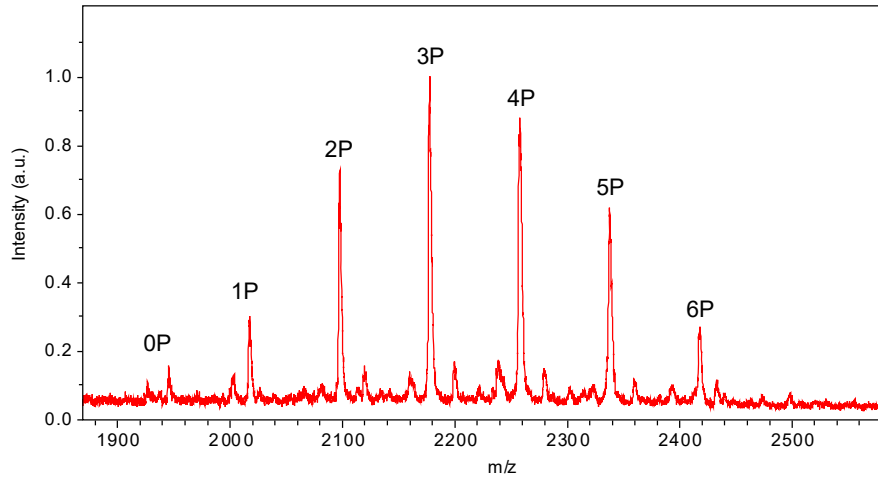

Figure S2: MALDI TOF MS of the C-terminal fragment of phosphorylated rhodopsin.
